# Supplementary material
Source: PubMed Central journal article supplement (PMC4879604)

Synthesis and use of benzimidazole activity-based probes to validate target labeling and identify novel binding partners.

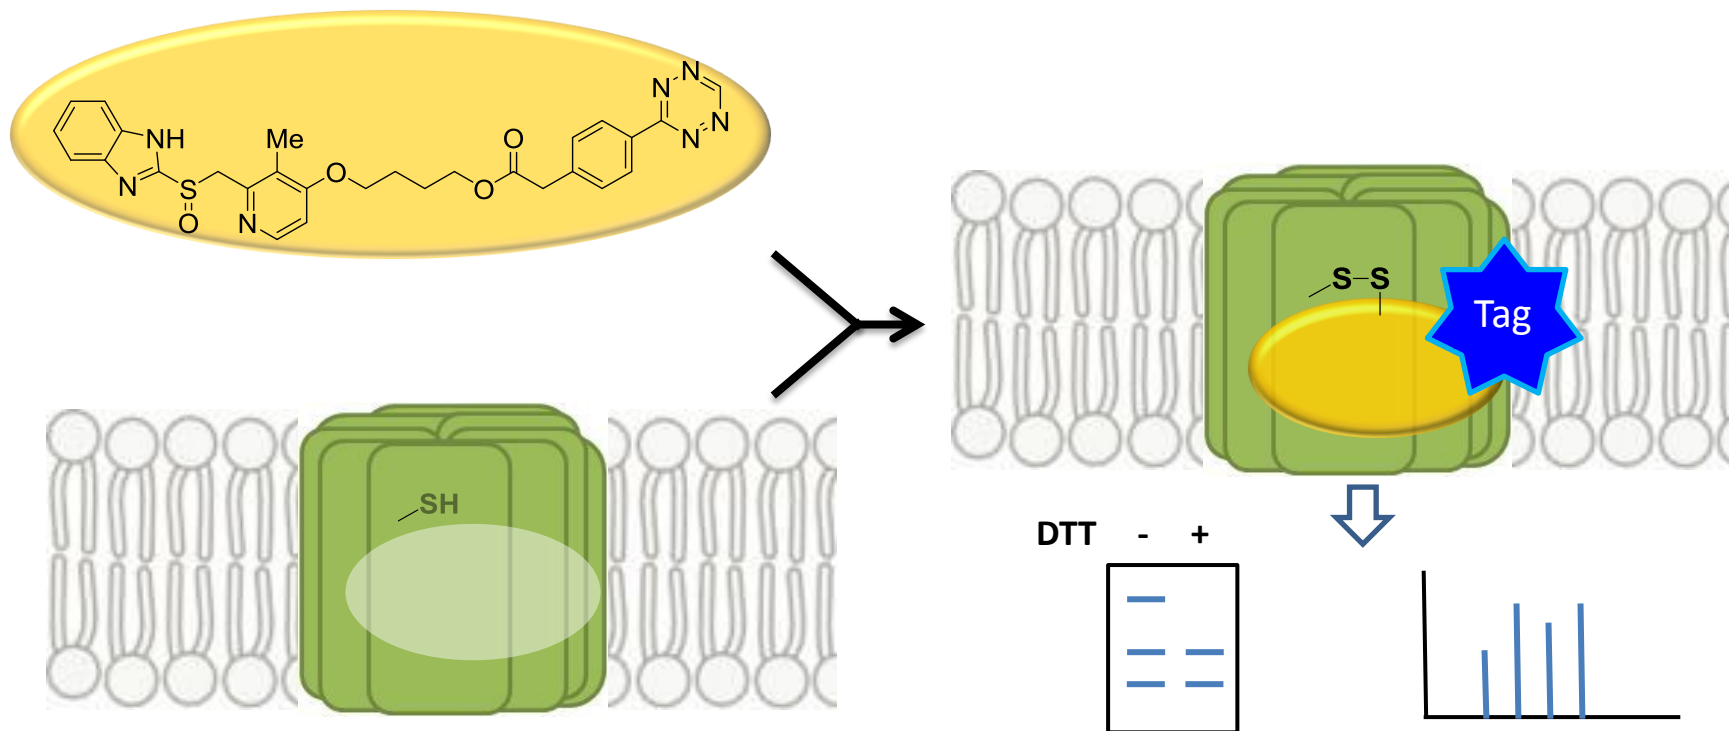

Supplement: NIHMS766833-supplement-Graphical_Abstract.pdf [file NIHMS766833-supplement-Graphical_Abstract.pdf]
